# Supplementary material for: Structural basis of G-quadruplex DNA recognition by the yeast telomeric protein Rap1
Source: PubMed Central journal article supplement — Nucleic Acids Res. 2020 Mar 18;48(8):4562–71. doi: 10.1093/nar/gkaa171 (PMC7192608; doi:10.1093/nar/gkaa171), 2020-03-18
Supplement: gkaa171_supplemental_file.pdf [file gkaa171_supplemental_file.pdf]

## Supplementary Figure 1

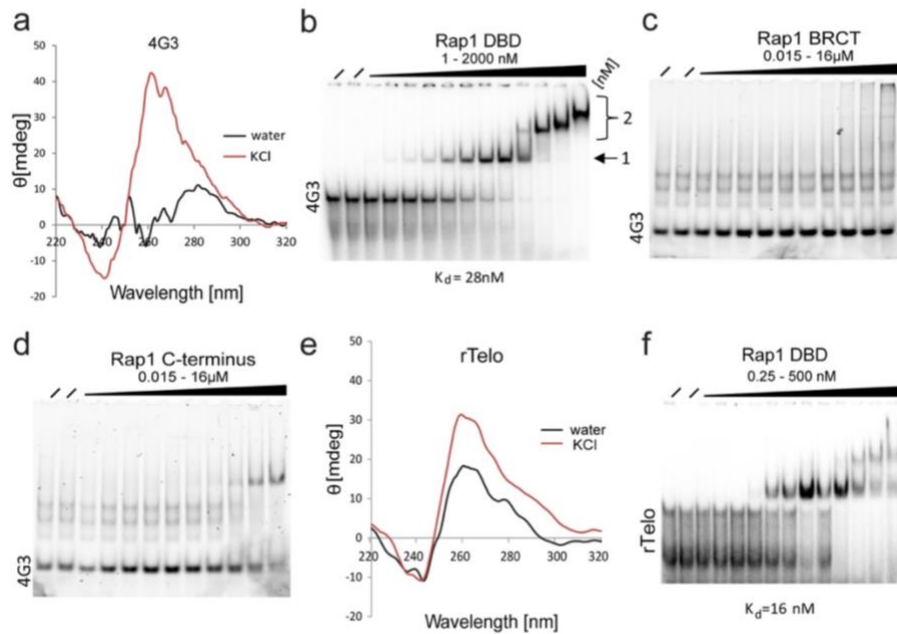

**Supp. Figure 1. Binding activity of Rap1-DBD for different G-quadruplexes. a)** CD spectrum of the 4G3 oligonucleotide folded in KCl. The spectrum confirms it forms a parallel G-quadruplex. **b)** EMSA of the 4G3 G-quadruplex incubated with increasing concentrations of Rap1-DBD. **c)** and **d)** EMSA of the 4G3 G-quadruplex incubated with increasing concentrations of the Rap1 BRCT and RAP1 C-Terminal RCT domain respectively. **e)** and **f)** CD spectrum of the rTelo oligonucleotide and EMSA of the parallel rG-quadruplex incubated with increasing concentrations of Rap1-DBD. The apparent  $K_d$ = 16nM.

## Supplementary Figure 2

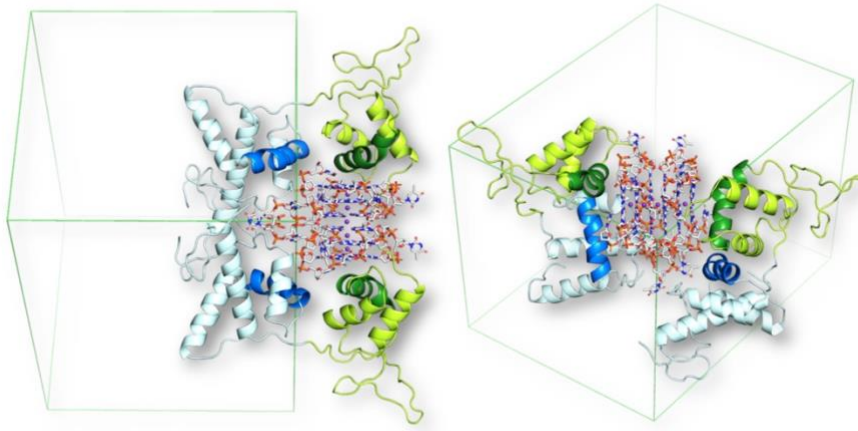

**Supp. Figure 2. Crystal packing.** Two views of the stacking of two G-quadruplex-Rap1-DBD complexes in the crystal forming a dimer. The box represents the unit cell.

### Supplementary Figure 3

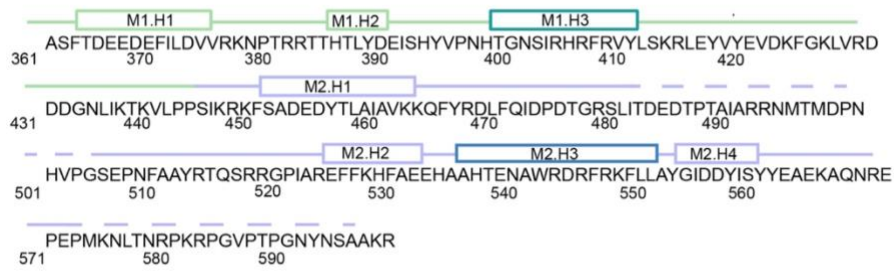

**Supp. Figure 3. Amino acid sequence and structure of the *S. cerevisiae* Rap1-DBD.** The structural domains of the protein are shown above the Rap1-DBD amino acid sequence and colour-coded as in the crystal structure: Myb1 domain in green; Myb2 domain in blue. Open rectangles indicate the positions of  $\alpha$ -helices, and broken lines mark regions of structural disorder.

Supplementary Figure 4

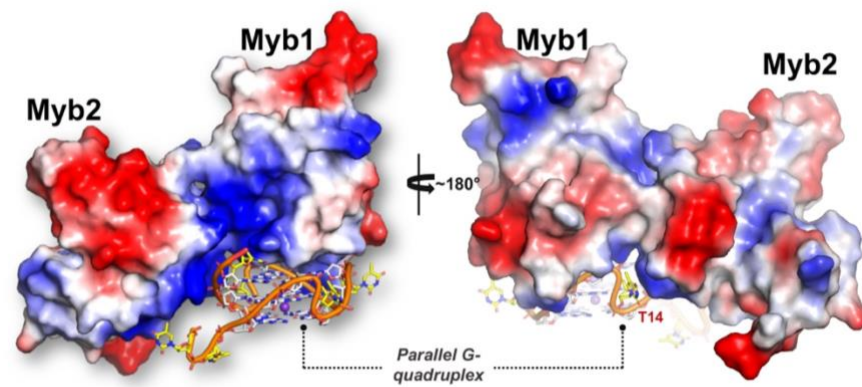

**Supp. Figure 4.** Electrostatic surface representation of the Rap1-DBD structure. The two views are related by a 180° rotation.

## Supplementary Figure 5

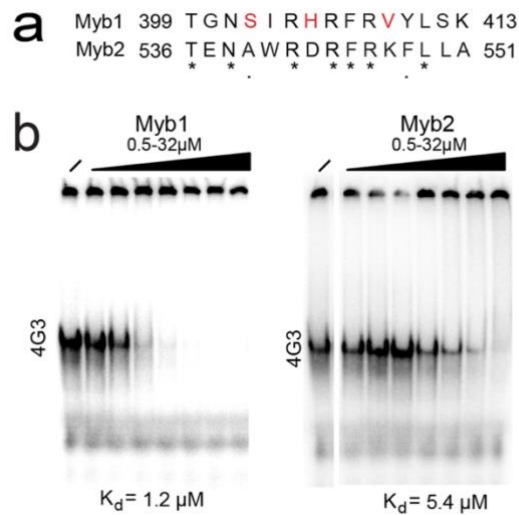

**Supp. Figure 5. Binding analysis of the Myb1 and Myb2 DNA-binding helix peptides to G-quadruplex DNA.** **a)** Sequence alignment of the two peptides representing the DNA-recognition  $\alpha$ -helix of Myb1 and Myb2 domains. Identical residues are pinpointed by an asterisk and similar ones by a dot. Hydrophobic residues used in G-tetrad recognition by Myb1 are highlighted in red. **B)** EMSA comparing the binding affinity of the peptide from Myb1 spanning the DNA-recognition  $\alpha$ -helix of Myb1 domain with that of the Myb2 domain for the 4G3 G-quadruplex. The [ $^{32}$ P] labelled DNA at 100pM and incubated with increasing protein concentrations (from 0.5 to 32 $\mu$ M).

Supplementary Table 1:

| <b>Data collection</b>                                       |                            |
|--------------------------------------------------------------|----------------------------|
| X-ray source                                                 | <b>X06DA (SLS)</b>         |
| Wavelength (Å)                                               | 1.072                      |
| Space group                                                  | C121                       |
| Unit-cell dimensions                                         |                            |
| a, b, c (Å)                                                  | 84.68, 70.20, 64.85        |
| $\alpha$ , $\beta$ , $\gamma$ (°)                            | 90.0, 97.2, 90.0           |
| Resolution range <sup>a</sup> (Å)                            | 35.09 – 2.40 (2.53 – 2.40) |
| $R_{\text{mergea}}$                                          | 0.055 (0.406)              |
| $\langle I \rangle / \langle \sigma(I) \rangle$ <sup>a</sup> | 8.7 (2.0)                  |
| CC <sub>1/2a</sub>                                           | 0.99 (0.91)                |
| R <sub>pim</sub>                                             | 0.04 (0.312)               |
| Unique reflections                                           | 14498 (2078)               |
| Completeness (%)                                             | 99.1 (99.5)                |
| <b>Structure Refinement</b>                                  |                            |
| Refinement ( $R_{\text{work}}/R_{\text{free}}$ )             | 0.233 / 0.203              |
| r.m.s.d distances (Å <sub>2</sub> )                          | 0.01                       |
| r.m.s.d bond angles (°)                                      | 0.89                       |
| Estimated coordinate error (Å)                               | 0.34                       |
| <b>Ramachandran plot</b>                                     |                            |
| Favoured regions (%)                                         | 94.12                      |
| Allowed regions (%)                                          | 5.88                       |
| Disallowed regions (%)                                       | 0.00                       |

<sup>a</sup> Values in parentheses are for the highest-resolution shell.
